# Supplementary material for: Chlorella sorokiniana-Induced Activation and Maturation of Human Monocyte-Derived Dendritic Cells through NF-κB and PI3K/MAPK Pathways
Source: Hindawi journal article supplement (doi:10.1155/2012/735396), 2012-01-01
Supplement: f1 [file 735396.f1.pdf]

# Supplemental Figure

Chou et al., Supplemental Figure 1

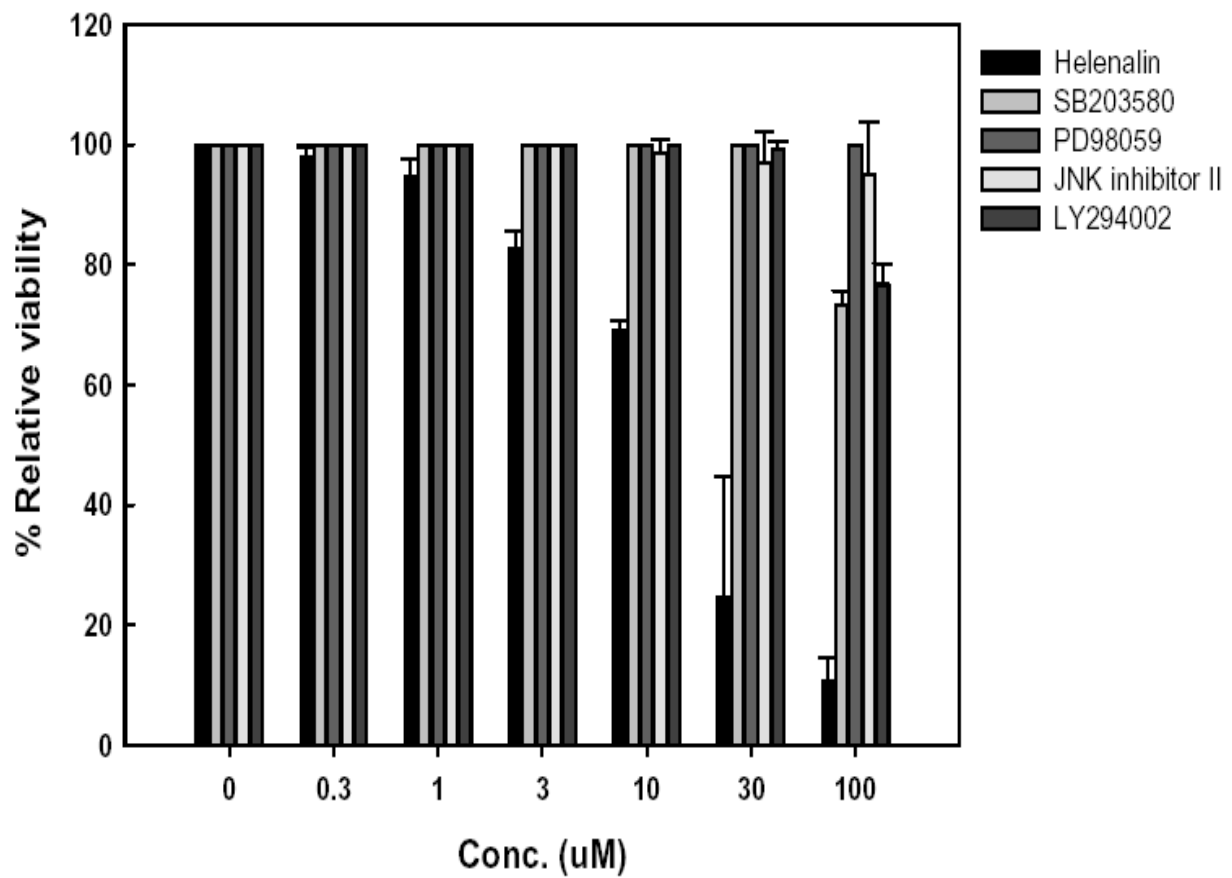

Supplemental Figure 1. Dose-dependent cytotoxicity of MAPK inhibitors. PBMCs treated with different doses of MAPK inhibitors for 72hr, and followed by alamarblue treatment for 24hr (N=3).
